# Supplementary material
Source: PubMed Central journal article supplement (PMC4392723)
Supplement: NIHMS677504-supplement-Supplementary_Table_1.pdf [file NIHMS677504-supplement-Supplementary_Table_1.pdf]

**Supplementary Table 1.** Examples of published proteogenomics studies for different organisms.

| <b>Organism</b>                                                  | <b>Reference</b> |
|------------------------------------------------------------------|------------------|
| <i>Pristionchus pacificus</i>                                    | 1                |
| <i>Arabidopsis</i>                                               | 2, 3             |
| <i>Deinococcus deserti</i>                                       | 4, 5             |
| <i>Drosophila melanogaster</i>                                   | 6-8              |
| <i>Zea mays</i>                                                  | 9                |
| <i>Anopheles gambiae</i>                                         | 10               |
| <i>Mycobacterium tuberculosis</i>                                | 11, 12           |
| <i>Mycobacterium leprae</i>                                      | 13               |
| <i>Saccharomyces cerevisiae</i>                                  | 14, 15           |
| <i>Candida glabrata</i>                                          | 16               |
| <i>M-smegmatis</i>                                               | 17               |
| <i>Toxoplasma gondii</i>                                         | 18               |
| <i>Stagonospora nodorum</i>                                      | 19               |
| <i>C. elegans</i>                                                | 20               |
| <i>Cryptococcus neoformans</i>                                   | 21               |
| <i>Spiroplasma melliferum</i>                                    | 22               |
| <i>Salmonella Typhimurium</i>                                    | 23               |
| <i>Blumeria graminis</i> f. sp <i>hordei</i> . (fungal pathogen) | 24-26            |
| <i>Schizosaccharomyces pombe</i>                                 | 27               |
| Planarian <i>Schmidtea mediterranea</i> (parasitic worm)         | 28               |
| Antarctic Archaeon <i>Methanococcoides burtonii</i>              | 29               |
| <i>Leptospira interrogans</i> serovar Lai                        | 30               |
| Psychotria Leaf                                                  | 31               |
| <i>Apis mellifera</i> L. (honey bee)                             | 32               |
| <i>Aspergillus flavus</i>                                        | 33, 34           |
| <i>Ruegeria pomeroyi</i>                                         | 35               |
| Roseobacter (group of bacteria -comparative)                     | 36               |
| <i>Echinococcus granulosus</i>                                   | 37               |
| <i>Arhodomonas</i> sp Strain Rozel                               | 38               |
| <i>Flavobacterium columnare</i> (fish pathogen)                  | 39               |
| <i>Edwardsiella ictaluri</i>                                     | 40               |
| <i>Methanosarcina acetivorans</i>                                | 41               |
| <i>Daphnia pulex</i> and <i>Daphnia longicephala</i>             | 42               |
| <i>Riftia pachyptila</i> and <i>Tevnia jerichonana</i>           | 43               |
| Rice                                                             | 44               |
| <i>Porphyromonas gingivalis</i>                                  | 45               |
| <i>Mycoplasma mobile</i>                                         | 46               |
| <i>Anopheles gambiae</i>                                         | 47, 48           |
| <i>Pseudomonas fluorescens</i> Pf0-1                             | 49               |
| <i>Escherichia coli</i>                                          | 50               |
| <i>Bradyrhizobium japonicum</i> USDA110                          | 51               |
| Channel catfish                                                  | 52               |

|                                              |    |
|----------------------------------------------|----|
| Acholeplasma laidlawii                       | 53 |
| Acidiphilium cryptum JF-5                    | 54 |
| Saccharopolyspora erythraea                  | 55 |
| Bacillus anthracis                           | 56 |
| Helicobacter pylori strain 26695             | 57 |
| Streptococcus pyogenes SF370                 | 58 |
| Mycoplasma genitalium                        | 59 |
| Leishmania donovani                          | 60 |
| Yersinia pestis                              | 61 |
| Streptococcus suis                           | 62 |
| Streptococcus pneumoniae Virulent Phage Dp-1 | 63 |
| Roseobacter Denitrificans Och114             | 64 |
| Venturia pirina                              | 65 |
| Nicotiana occidentalis                       | 66 |
| Mycoplasma hyopneumoniae virulent strain 232 | 67 |
| Clostridium stercoararium DSM8532            | 68 |
| Dehalococcoides mccartyi strain CBDB1        | 69 |
| Methylobacterium extorquens AM1 (ME-AM1)     | 70 |
| Zebrafish                                    | 71 |

1. Borchert N, Dieterich C, Krug K, Schutz W, Jung S, Nordheim A, Sommer RJ, Macek B: **Proteogenomics of Pristionchus pacificus reveals distinct proteome structure of nematode models.** *Genome Research* 2010, **20**(6):837-846.
2. Baerenfaller K, Grossmann J, Grobei MA, Hull R, Hirsch-Hoffmann M, Yalovsky S, Zimmermann P, Grossniklaus U, Gruissem W, Baginsky S: **Genome-scale proteomics reveals Arabidopsis thaliana gene models and proteome dynamics.** *Science* 2008, **320**(5878):938-941.
3. Castellana NE, Payne SH, Shen ZX, Stanke M, Bafna V, Briggs SP: **Discovery and revision of Arabidopsis genes by proteogenomics.** *Proceedings of the National Academy of Sciences of the United States of America* 2008, **105**(52):21034-21038.
4. Baudet M, Ortet P, Gaillard JC, Fernandez B, Guerin P, Enjalbal C, Subra G, de Groot A, Barakat M, Dedieu A *et al*: **Proteomics-based Refinement of Deinococcus deserti Genome Annotation Reveals an Unwonted Use of Non-canonical Translation Initiation Codons.** *Molecular & Cellular Proteomics* 2010, **9**(2):415-426.
5. de Groot A, Dulermo R, Ortet P, Blanchard L, Guerin P, Fernandez B, Vacherie B, Dossat C, Jolivet E, Siguier P *et al*: **Alliance of Proteomics and Genomics to Unravel the Specificities of Sahara Bacterium Deinococcus deserti.** *Plos Genetics* 2009, **5**:e1000434.
6. Brunner E, Ahrens CH, Mohanty S, Baetschmann H, Loevenich S, Potthast F, Deutsch EW, Panse C, de Lichtenberg U, Rinner O *et al*: **A high-quality catalog of the Drosophila melanogaster proteome.** *Nature Biotechnology* 2007, **25**(5):576-583.
7. Findlay GD, MacCoss MJ, Swanson WJ: **Proteomic discovery of previously unannotated, rapidly evolving seminal fluid genes in Drosophila.** *Genome Research* 2009, **19**(5):886-896.

8. Loevenich SN, Brunner E, King NL, Deutsch EW, Stein SE, Aebersold R, Hafen E, FlyBase C: **The Drosophila melanogaster PeptideAtlas facilitates the use of peptide data for improved fly proteomics and genome annotation.** *Bmc Bioinformatics* 2009, **10**:59.
9. Castellana NE, Shen ZX, He YP, Walley JW, Cassidy CJ, Briggs SP, Bafna V: **An automated proteogenomic method uses mass spectrometry to reveal novel genes in Zea mays.** *Molecular & Cellular Proteomics* 2014, **13**(1):157-167.
10. Chaerkady R, Kelkar DS, Muthusamy B, Kandasamy K, Dwivedi SB, Sahasrabudhe NA, Kim MS, Renuse S, Pinto SM, Sharma R *et al*: **A proteogenomic analysis of Anopheles gambiae using high-resolution Fourier transform mass spectrometry.** *Genome Research* 2011, **21**(11):1872-1881.
11. de Souza GA, Malen H, Softeland T, Saelensminde G, Prasad S, Jonassen I, Wiker HG: **High accuracy mass spectrometry analysis as a tool to verify and improve gene annotation using Mycobacterium tuberculosis as an example.** *BMC Genomics* 2008, **9**:316.
12. Kelkar DS, Kumar D, Kumar P, Balakrishnan L, Muthusamy B, Yadav AK, Shrivastava P, Marimuthu A, Anand S, Sundaram H *et al*: **Proteogenomic Analysis of Mycobacterium tuberculosis By High Resolution Mass Spectrometry.** *Molecular & Cellular Proteomics* 2011, **10**(12): M111.011627.
13. de Souza GA, Softeland T, Koehler CJ, Thiede B, Wiker HG: **Validating divergent ORF annotation of the Mycobacterium leprae genome through a full translation data set and peptide identification by tandem mass spectrometry.** *Proteomics* 2009, **9**(12):3233-3243.
14. Oshiro G, Wodicka LM, Washburn MP, Yates JR, Lockhart DJ, Winzeler EA: **Parallel identification of new genes in Saccharomyces cerevisiae.** *Genome Research* 2002, **12**(8):1210-1220.
15. Helsens K, Van Damme P, Degroeve S, Martens L, Arnesen T, Vandekerckhove J, Gevaert K: **Bioinformatics Analysis of a Saccharomyces cerevisiae N-Terminal Proteome Provides Evidence of Alternative Translation Initiation and Post-Translational N-Terminal Acetylation.** *Journal of Proteome Research* 2011, **10**(8):3578-3589.
16. Prasad TSK, Harsha HC, Keerthikumar S, Sekhar NR, Selvan LDN, Kumar P, Pinto SM, Muthusamy B, Subbannayya Y, Renuse S *et al*: **Proteogenomic Analysis of Candida glabrata using High Resolution Mass Spectrometry.** *Journal of Proteome Research* 2012, **11**(1):247-260.
17. Wang R, Prince JT, Marcotte EM: **Mass spectrometry of the M-smegmatis proteome: Protein expression levels correlate with function, operons, and codon bias.** *Genome Research* 2005, **15**(8):1118-1126.
18. Xia D, Sanderson SJ, Jones AR, Prieto JH, Yates JR, Bromley E, Tomley FM, Lal K, Sinden RE, Brunk BP *et al*: **The proteome of Toxoplasma gondii: integration with the genome provides novel insights into gene expression and annotation.** *Genome Biology* 2008, **9**(7): R116.
19. Bringans S, Hane JK, Casey T, Tan KC, Lipscombe R, Solomon PS, Oliver RP: **Deep proteogenomics; high throughput gene validation by multidimensional liquid chromatography and mass spectrometry of proteins from the fungal wheat pathogen Stagonospora nodorum.** *Bmc Bioinformatics* 2009, **10**:301.

20. Merrihew GE, Davis C, Ewing B, Williams G, Kall L, Frewen BE, Noble WS, Green P, Thomas JH, MacCoss MJ: **Use of shotgun proteomics for the identification, confirmation, and correction of *C. elegans* gene annotations.** *Genome Research* 2008, **18**(10):1660-1669.
21. Nagarajha Selvan L, Kaviyil J, Nirujogi R, Muthusamy B, Puttamalles V, Subbannayya T, Syed N, Radhakrishnan A, Kelkar D, Ahmad S *et al*: **Proteogenomic analysis of pathogenic yeast *Cryptococcus neoformans* using high resolution mass spectrometry.** *Clinical Proteomics* 2014, **11**(1):5.
22. Alexeev D, Kostrjukova E, Aliper A, Popenko A, Bazaleev N, Tyakht A, Selezneva O, Akopian T, Prichodko E, Kondratov I *et al*: **Application of Spiroplasma melliferum Proteogenomic Profiling for the Discovery of Virulence Factors and Pathogenicity Mechanisms in Host-associated Spiroplasmas.** *Journal of Proteome Research* 2012, **11**(1):224-236.
23. Ansong C, Tolic N, Purvine SO, Porwollik S, Jones M, Yoon H, Payne SH, Martin JL, Burnet MC, Monroe ME *et al*: **Experimental annotation of post-translational features and translated coding regions in the pathogen *Salmonella Typhimurium*.** *Bmc Genomics* 2011, **12**:433.
24. Bindschedler LV, Burgis TA, Mills DJS, Ho JTC, Cramer R, Spanu PD: **In Planta Proteomics and Proteogenomics of the Biotrophic Barley Fungal Pathogen *Blumeria graminis f. sp hordei*.** *Molecular & Cellular Proteomics* 2009, **8**(10):2368-2381.
25. Bindschedler LV, McGuffin LJ, Burgis TA, Spanu PD, Cramer R: **Proteogenomics and in silico structural and functional annotation of the barley powdery mildew *Blumeria graminis f. sp hordei*.** *Methods* 2011, **54**(4):432-441.
26. Pedersen C, van Themaat EVL, McGuffin LJ, Abbott JC, Burgis TA, Barton G, Bindschedler LV, Lu XL, Maekawa T, Wessling R *et al*: **Structure and evolution of barley powdery mildew effector candidates.** *Bmc Genomics* 2012, **13**:694.
27. Bitton DA, Wood V, Scutt PJ, Grallert A, Yates T, Smith DL, Hagan IM, Miller CJ: **Augmented Annotation of the *Schizosaccharomyces pombe* Genome Reveals Additional Genes Required for Growth and Viability.** *Genetics* 2011, **187**(4):1207-U1369.
28. Bocchinfuso DG, Taylor P, Ross E, Ignatchenko A, Ignatchenko V, Kislinger T, Pearson BJ, Moran MF: **Proteomic Profiling of the Planarian *Schmidtea mediterranea* and Its Mucous Reveals Similarities with Human Secretions and Those Predicted for Parasitic Flatworms.** *Molecular & Cellular Proteomics* 2012, **11**(9):681-691.
29. Burg DW, Lauro FM, Williams TJ, Raftery MJ, Guilhaus M, Cavicchioli R: **Analyzing the Hydrophobic Proteome of the Antarctic Archaeon *Methanococcoides burtonii* Using Differential Solubility Fractionation.** *Journal of Proteome Research* 2010, **9**(2):664-676.
30. Cao XJ, Dai J, Xu H, Nie S, Chang X, Hu BY, Sheng QH, Wang LS, Ning ZB, Li YX *et al*: **High-coverage proteome analysis reveals the first insight of protein modification systems in the pathogenic spirochete *Leptospira interrogans*.** *Cell Research* 2010, **20**(2):197-210.
31. Carlier AL, Omasits U, Ahrens CH, Eberl L: **Proteomics Analysis of *Psychotria* Leaf Nodule Symbiosis: Improved Genome Annotation and Metabolic Predictions.** *Molecular Plant-Microbe Interactions* 2013, **26**(11):1325-1333.

32. Chan QWT, Parker R, Sun Z, Deutsch EW, Foster LJ: **A honey bee (*Apis mellifera* L.) PeptideAtlas crossing castes and tissues.** *Bmc Genomics* 2011, **12**:290.
33. Chang KY, Georgianna DR, Heber S, Payne GA, Muddiman DC: **Detection of Alternative Splice Variants at the Proteome Level in *Aspergillus flavus*.** *Journal of Proteome Research* 2010, **9**(3):1209-1217.
34. Chang KY, Muddiman DC: **Identification of alternative splice variants in *Aspergillus flavus* through comparison of multiple tandem MS search algorithms.** *Bmc Genomics* 2011, **12**:358.
35. Christie-Oleza JA, Miotello G, Armengaud J: **High-throughput proteogenomics of *Ruegeria pomeroyi*: seeding a better genomic annotation for the whole marine *Roseobacter* clade.** *Bmc Genomics* 2012, **13**:73.
36. Christie-Oleza JA, Pina-Villalonga JM, Bosch R, Nogales B, Armengaud J: **Comparative Proteogenomics of Twelve *Roseobacter* Exoproteomes Reveals Different Adaptive Strategies Among These Marine Bacteria.** *Molecular & Cellular Proteomics* 2012, **11**(2):M111.013110.
37. Cui SJ, Xu LL, Zhang T, Xu M, Yao J, Fang CY, Feng Z, Yang PY, Hu W, Liu F: **Proteomic characterization of larval and adult developmental stages in *Echinococcus granulosus* reveals novel insight into host-parasite interactions.** *Journal of Proteomics* 2013, **84**:158-175.
38. Dalvi S, Azetsu S, Patrauchan MA, Aktas DF, Fathepure BZ: **Proteogenomic Elucidation of the Initial Steps in the Benzene Degradation Pathway of a Novel Halophile, *Arhodomonas* sp Strain Rozel, Isolated from a Hypersaline Environment.** *Applied and Environmental Microbiology* 2012, **78**(20):7309-7316.
39. Dumpala PR, Gulsoy N, Lawrence ML, Karsi A: **Proteomic analysis of the fish pathogen *Flavobacterium columnare*.** *Proteome Science* 2010, **8**:26.
40. Dumpala PR, Lawrence ML, Karsi A: **Proteome analysis of *Edwardsiella ictaluri*.** *Proteomics* 2009, **9**(5):1353-1363.
41. Ferguson JT, Wenger CD, Metcalf WW, Kelleher NL: **Top-Down Proteomics Reveals Novel Protein Forms Expressed in *Methanosarcina acetivorans*.** *Journal of the American Society for Mass Spectrometry* 2009, **20**(9):1743-1750.
42. Frohlich T, Arnold GJ, Fritsch R, Mayr T, Laforsch C: **LC-MS/MS-based proteome profiling in *Daphnia pulex* and *Daphnia longicephala*: the *Daphnia pulex* genome database as a key for high throughput proteomics in *Daphnia*.** *Bmc Genomics* 2009, **10**:171.
43. Gardebrecht A, Markert S, Sievert SM, Felbeck H, Thurmer A, Albrecht D, Wollherr A, Kabisch J, Le Bris N, Lehmann R *et al*: **Physiological homogeneity among the endosymbionts of *Riftia pachyptila* and *Tevnia jerichonana* revealed by proteogenomics.** *Isme Journal* 2012, **6**(4):766-776.
44. Helmy M, Tomita M, Ishihama Y: **OryzaPG-DB: Rice Proteome Database based on Shotgun Proteogenomics.** *Bmc Plant Biology* 2011, **11**:63.
45. Hendrickson EL, Xia QW, Wang TS, Lamont RJ, Hackett M: **Pathway analysis for intracellular *Porphyromonas gingivalis* using a strain ATCC 33277 specific database.** *Bmc Microbiology* 2009, **9**:185.
46. Jaffe JD, Stange-Thomann N, Smith C, DeCaprio D, Fisher S, Butler J, Calvo S, Elkins T, Fitzgerald MG, Hafez N *et al*: **The complete genome and proteome of *Mycoplasma mobile*.** *Genome Research* 2004, **14**(8):1447-1461.

47. Kalume DE, Peri S, Reddy R, Zhong J, Okulate M, Kumar N, Pandey A: **Genome annotation of Anopheles gambiae using mass spectrometry-derived data.** *Bmc Genomics* 2005, **6**:128.
48. Li J, Riehle MM, Zhang Y, Xu JN, Oduol F, Gomez SM, Eiglmeier K, Beatrix MU, Shabanowitz J, Donald FH *et al*: **Anopheles gambiae genome reannotation through synthesis of ab initio and comparative gene prediction algorithms.** *Genome Biology* 2006, **7**(3):R24.
49. Kim W, Silby MW, Purvine SO, Nicoll JS, Hixson KK, Monroe M, Nicora CD, Lipton MS, Levy SB: **Proteomic Detection of Non-Annotated Protein-Coding Genes in Pseudomonas fluorescens Pf0-1.** *Plos One* 2009, **4**(12).
50. Krug K, Carpy A, Behrends G, Matic K, Soares NC, Macek B: **Deep coverage of the Escherichia coli proteome enables the assessment of false discovery rates in simple proteogenomic experiments.** *Molecular & Cellular Proteomics* 2013, **12**(11):3420-3430.
51. Kumar D, Yadav AK, Kadimi PK, Nagaraj SH, Grimmond SM, Dash D: **Proteogenomic Analysis of Bradyrhizobium japonicum USDA110 Using Genosuite, an Automated Multi-algorithmic Pipeline.** *Molecular & Cellular Proteomics* 2013, **12**(11):3388-3397.
52. Kunec D, Nanduri B, Burgess SC: **Experimental annotation of channel catfish virus by probabilistic proteogenomic mapping.** *Proteomics* 2009, **9**(10):2634-2647.
53. Lazarev VN, Levitskii SA, Basovskii YI, Chukin MM, Akopian TA, Vereshchagin VV, Kostjukova ES, Kovaleva GY, Kazanov MD, Malko DB *et al*: **Complete Genome and Proteome of Acholeplasma laidlawii.** *Journal of Bacteriology* 2011, **193**(18):4943-4953.
54. Magnuson TS, Swenson MW, Paszczynski AJ, Deobald LA, Kerk D, Cummings DE: **Proteogenomic and functional analysis of chromate reduction in Acidiphilium cryptum JF-5, an Fe(III)-respiring acidophile.** *Biometals* 2010, **23**(6):1129-1138.
55. Marcellin E, Licona-Cassani C, Mercer TR, Palfreyman RW, Nielsen LK: **Re-annotation of the Saccharopolyspora erythraea genome using a systems biology approach.** *Bmc Genomics* 2013, **14**:699.
56. Misra RV, Ahmod NZ, Parker R, Fang M, Shah H, Gharbia S: **Developing an integrated proteo-genomic approach for the characterisation of biomarkers for the identification of Bacillus anthracis.** *Journal of Microbiological Methods* 2012, **88**(2):237-247.
57. Muller SA, Findeiss S, Pernitzsch SR, Wissenbach DK, Stadler PF, Hofacker IL, von Bergen M, Kalkhof S: **Identification of new protein coding sequences and signal peptidase cleavage sites of Helicobacter pylori strain 26695 by proteogenomics.** *Journal of Proteomics* 2013, **86**:27-42.
58. Okamoto A, Yamada K: **Proteome driven re-evaluation and functional annotation of the Streptococcus pyogenes SF370 genome.** *Bmc Microbiology* 2011, **11**:249.
59. Parraga-Nino N, Colome-Calls N, Canals F, Querol E, Ferrer-Navarro M: **A Comprehensive Proteome of Mycoplasma genitalium.** *Journal of Proteome Research* 2012, **11**(6):3305-3316.
60. Pawar H, Sahasrabuddhe NA, Renuse S, Keerthikumar S, Sharma J, Kumar GSS, Venugopal A, Sekhar NR, Kelkar DS, Nemade H *et al*: **A proteogenomic approach to map the proteome of an unsequenced pathogen - Leishmania donovani.** *Proteomics* 2012, **12**(6):832-844.

61. Payne SH, Huang ST, Pieper R: **A proteogenomic update to Yersinia: enhancing genome annotation.** *Bmc Genomics* 2010, **11**:460.
62. Rodriguez-Ortega MJ, Luque I, Tarradas C, Barcena JA: **Overcoming function annotation errors in the Gram-positive pathogen Streptococcus suis by a proteomics-driven approach.** *Bmc Genomics* 2008, **9**:588.
63. Sabri M, Hauser R, Ouellette M, Liu J, Dehbi M, Moeck G, Garcia E, Titz B, Uetz P, Moineau S: **Genome Annotation and Intraviral Interactome for the Streptococcus pneumoniae Virulent Phage Dp-1.** *Journal of Bacteriology* 2011, **193**(2):551-562.
64. Bland C, Hartmann EM, Christie-Oleza JA, Fernandez B, Armengaud J: **N-Terminal-oriented Proteogenomics of the Marine Bacterium Roseobacter Denitrificans Och114 using N-Succinimidylloxycarbonylmethyl tris( 2,4,6-trimethoxyphenyl) phosphonium bromide ( TMPP) Labeling and Diagonal Chromatography\*.** *Molecular & Cellular Proteomics* 2014, **13**(5):1369-1381.
65. Cooke IR, Jones D, Bowen JK, Deng C, Faou P, Hall NE, Jayachandran V, Liem M, Taranto AP, Plummer KM *et al*: **Proteogenomic Analysis of the Venturia pirina (Pear Scab Fungus) Secretome Reveals Potential Effectors.** *Journal of Proteome Research* 2014, **13**(8):3635-3644.
66. Luge T, Kube M, Freiwald A, Meierhofer D, Seemuller E, Sauer S: **Transcriptomics assisted proteomic analysis of Nicotiana occidentalis infected by Candidatus Phytoplasma mali strain AT.** *Proteomics* 2014, **14**(16):1882-1889.
67. Pendarvis K, Padula MP, Tacchi JL, Petersen AC, Djordjevic SP, Burgess SC, Minion FC: **Proteogenomic mapping of Mycoplasma hyopneumoniae virulent strain 232.** *BMC Genomics* 2014, **15**:576.
68. Schellenberg JJ, Verbeke TJ, McQueen P, Krokhin OV, Zhang XL, Alvare G, Fristensky B, Thallinger GG, Henrissat B, Wilkins JA *et al*: **Enhanced whole genome sequence and annotation of Clostridium stercorarium DSM8532(T) using RNA-seq transcriptomics and high-throughput proteomics.** *BMC Genomics* 2014, **15**:567.
69. Schiffmann CL, Jehmlich N, Otto W, Hansen R, Nielsen PH, Adrian L, Seifert J, von Bergen M: **Proteome profile and proteogenomics of the organohalide-respiring bacterium Dehalococcoides mccartyi strain CBDB1 grown on hexachlorobenzene as electron acceptor.** *Journal of proteomics* 2014, **98**:59-64.
70. Kumar D, Mondal AK, Yadav AK, Dash D: **Discovery of rare protein coding genes in model methylotroph Methylobacterium extorquens AM1.** *Proteomics* 2014. doi: 10.1002/pmic.201400153. [Epub ahead of print]
71. Kelkar DS, Provost E, Chaerkady R, Muthusamy B, Manda SS, Subbannayya T, Selvan LD, Wang CH, Datta KK, Woo S *et al*: **Annotation of the zebrafish genome through an integrated transcriptomic and proteomic analysis.** *Mol Cell Proteomics* 2014, **24**:038299.
